# Supplementary material for: Exceptional alkaline hydrogen evolution by molybdenum-oxide-nitride-based electrocatalysts with fast water-dissociation and hydrogen-adsorption kinetics
Source: Royal Society of Chemistry journal article supplement (doi:10.1039/d2qm01349e), 2023-01-01
Supplement: d2qm01349e1.pdf [file d2qm01349e1.pdf]

## Supporting Information

### Exceptional Alkaline Hydrogen Evolution by Molybdenum-Oxide-Nitride-based Electrocatalysts with Fast Water-Dissociation and Hydrogen-Adsorption Kinetics

Zhongmin Wang,<sup>\*a</sup> Jing Qu,<sup>a,b</sup> Yanxiang He,<sup>c</sup> Tuzhi Xiong,<sup>c</sup> Zhimin Huang,<sup>a</sup> Feng Wang,<sup>\*b</sup> M.-Sadeeq Balogun<sup>\*b,c</sup>

#### XPS experimental parameters

X-ray photoelectron spectroscopy (XPS) analysis was performed using The ESCA lab 250 test. The instrument used a monochromated Al K $\alpha$  source 1486.6 eV and the base pressure was  $5 \times 10^{-10}$  Torr. The sample area analyzed was about  $700 \mu\text{m} \times 300 \mu\text{m}$ . A pass energy (PE) of 80 eV, corresponding to an all over Fermi edge resolution of  $0.89 \pm 0.02$  eV with a 0.5 eV step, was used to acquire wide range survey spectra. A PE of 20 eV, corresponding to an all over Fermi edge resolution of  $0.39 \pm 0.02$  eV with a 0.1 eV step, was used to acquire narrow spectra of the Mo 3d, C 1s, O 1s, Ni 2p, and N 1s orbitals. A PE of 40 eV, corresponding to an all over Fermi Edge resolution of  $0.56 \pm 0.02$  eV with a 0.15 eV step, was used to acquire spectra at the valence band energy region. All data were acquired using charge compensation to establish a steady state surface potential.

XPS data including peak fitting, line shape synthesis, envelope background modeling and subtraction was processed using the XPSpeak41. The acquired spectra required a binding energy calibration based on identifying a component peak within a data envelope. The procedure adopted was based on aligning a component peak within the O 1s spectrum rather than the more usual alignment based on a component within the C 1s spectrum. For the fitting of the Mo 3d XPS spectra,  $d_5:d_3 = 3:2$ . For the fitting of the Ni 2p XPS spectra,  $p_3:p_1 = 2:1$ .

For the peak area, the fitting of the Mo 3d XPS spectra was  $d_5:d_3 = 3:2$  and Ni 2p XPS spectra was  $p_3:p_1 = 2:1$ .

The FWHM of all the Mo 3d peaks for NiMoO<sub>4</sub>/MoO<sub>2</sub> include 2.33, 1.19, 1.83 and 1.89 for Mo<sup>4+</sup> 3d<sub>5/2</sub>, Mo<sup>6+</sup> 3d<sub>5/2</sub>, Mo<sup>4+</sup> 3d<sub>3/2</sub> and Mo<sup>6+</sup> 3d<sub>3/2</sub>, respectively. The FWHM of the Ni 2p peaks for NiMoO<sub>4</sub>/MoO<sub>2</sub> include 2.21, 3.61, 3.42, 2.21, 2.69 and 4.27 for Ni<sup>2+</sup> 2p<sub>3/2</sub>, Ni<sup>3+</sup> 2p<sub>3/2</sub>, Ni<sup>sat</sup> 2p<sub>3/2</sub>, Ni<sup>2+</sup> 2p<sub>1/2</sub>, Ni<sup>3+</sup> 2p<sub>1/2</sub> and Ni<sup>sat</sup> 2p<sub>1/2</sub>, respectively. The FWHM of the O 1s peaks for NiMoO<sub>4</sub>/MoO<sub>2</sub> include 1.52, 1.58 and 2.12 for Mo-O of MoO<sub>2</sub>, Mo-O of NiMoO<sub>4</sub> and adsorbed water molecules (O<sub>w</sub>) and Ni<sup>sat</sup> 2p<sub>1/2</sub>, respectively.

The FWHM of all the Mo 3d peaks for Ni<sub>0.2</sub>Mo<sub>0.8</sub>N/MoO<sub>2</sub> include 1.15, 1.44, 1.59, 0.96, 1.47 and 1.25 for Mo<sup>3+</sup> 3d<sub>5/2</sub>, Mo<sup>4+</sup> 3d<sub>5/2</sub>, Mo<sup>3+</sup> 3d<sub>3/2</sub>, Mo<sup>6+</sup> 3d<sub>5/2</sub>, Mo<sup>4+</sup> 3d<sub>3/2</sub> and Mo<sup>6+</sup> 3d<sub>3/2</sub>, respectively. The FWHM of all the Ni 2p peaks for Ni<sub>0.2</sub>Mo<sub>0.8</sub>N/MoO<sub>2</sub> include 1.47, 2.30, 3.00, 2.75, 2.69, 2.37, 3.32 and 3.31 for Ni<sup>0</sup> 2p<sub>3/2</sub>, Ni<sup>2+</sup> 2p<sub>3/2</sub>, Ni<sup>3+</sup> 2p<sub>3/2</sub>, Ni<sup>sat</sup> 2p<sub>3/2</sub>, Ni<sup>0</sup> 2p<sub>1/2</sub>, Ni<sup>2+</sup> 2p<sub>1/2</sub>, Ni<sup>3+</sup> 2p<sub>1/2</sub> and Ni<sup>sat</sup> 2p<sub>1/2</sub>, respectively. The FWHM of the O 1s peaks for Ni<sub>0.2</sub>Mo<sub>0.8</sub>N/MoO<sub>2</sub> include 1.79 and 3.05 for Mo-O of MoO<sub>2</sub>, Mo-O and oxygen deficient (O<sub>d</sub>) and Ni<sup>sat</sup> 2p<sub>1/2</sub>, respectively.

### ECSA Calculation

The  $C_{dl}$  was calculated according to the following equation:

$$C_{dl} = |j_a - j_c| / 2u,$$

where  $j_a$  and  $j_c$  are charging and discharging current densities and  $u$  is the scan rate.<sup>1</sup> The potential range of the measurements is from  $-0.93$  to  $-0.82$  V vs. SCE in a non-Faradaic region for the HER and the scan rates were from  $1.0$  to  $8.0$  mV s<sup>-1</sup>. The difference of charging and discharging current densities at  $0.01$  V vs. RHE was used for calculation.

### Conversion of $C_{dl}$ to ECSA

The specific capacitance for a flat surface is generally found to be in the range of  $20 - 60$   $\mu\text{F cm}^{-2}$ . In the following calculations of ECSA, we assume specific capacitance as  $40$   $\mu\text{F cm}^{-2}$ .

$$ECSA = \frac{C_{dl}}{40 \mu\text{F cm}^{-2}} \quad (2)$$

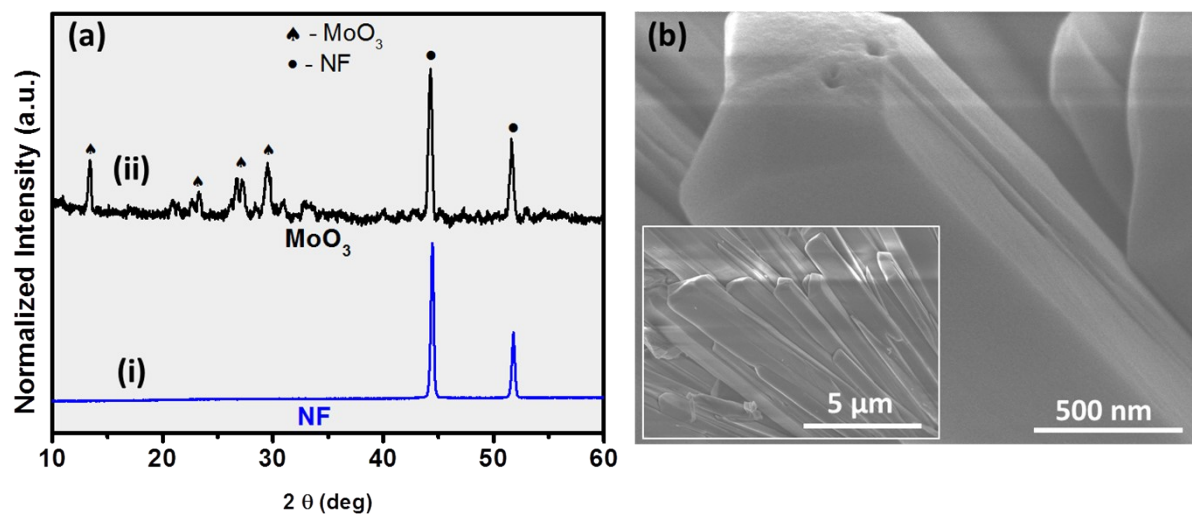

**Figure S1.** (a) XRD of the NF and  $\text{MoO}_3$  precursor. (b) SEM images of the  $\text{MoO}_3$  precursor.

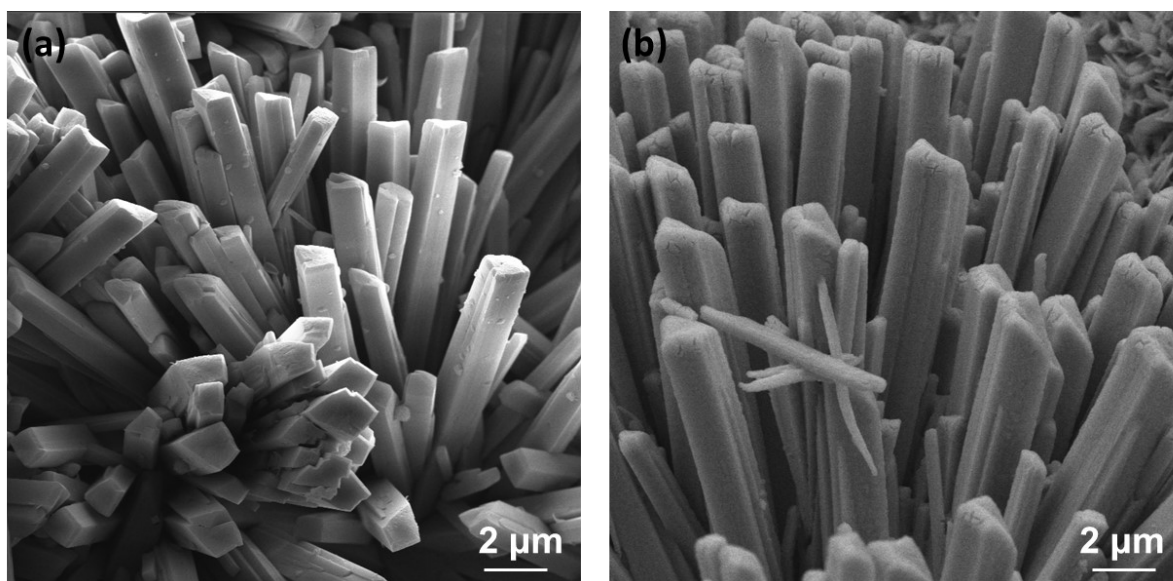

**Figure S2.** Low magnification SEM images of the (a)  $\text{NiMoO}_4/\text{MoO}_2$  and (b)  $\text{Ni}_{0.2}\text{Mo}_{0.8}\text{N}/\text{MoO}_2$ .

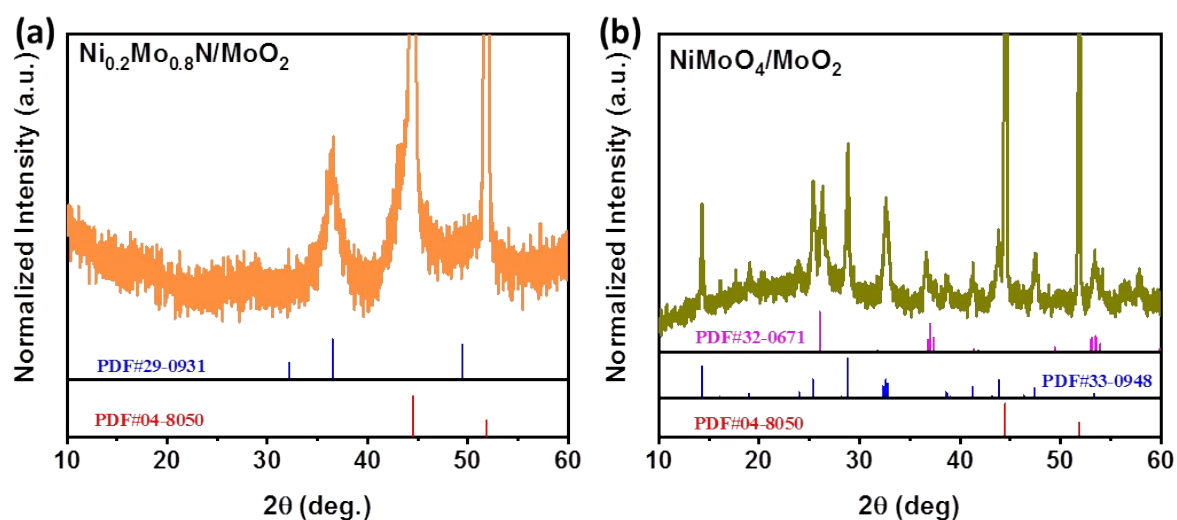

**Figure S3.** (a) XRD spectra of the  $\text{Ni}_{0.2}\text{Mo}_{0.8}\text{N}/\text{MoO}_2$  and  $\text{NiMoO}_4/\text{MoO}_2$  samples in the powdered form. XRD spectra of the (b)  $\text{Ni}_{0.2}\text{Mo}_{0.8}\text{N}/\text{MoO}_2$  and (c)  $\text{NiMoO}_4/\text{MoO}_2$  samples on the NF.

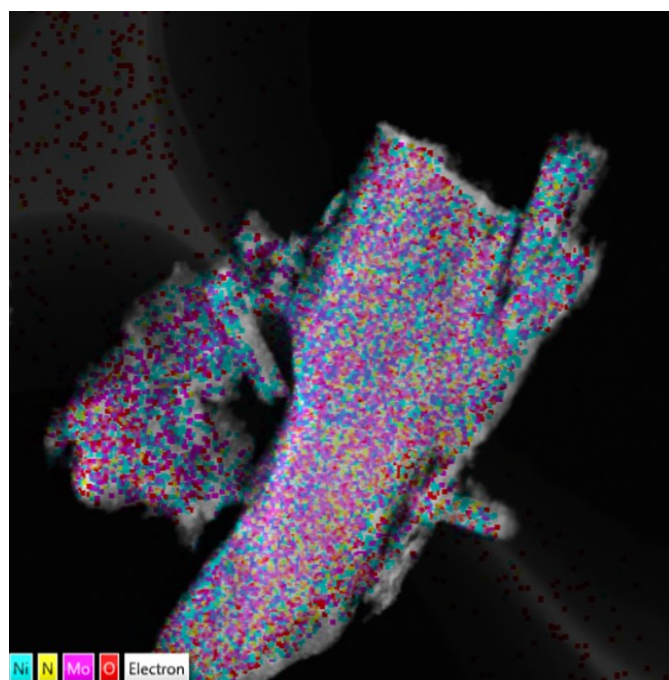

**Figure S4.** Sum of the elemental mapping image of the  $\text{Ni}_{0.2}\text{Mo}_{0.8}\text{N}/\text{MoO}_2$  nanorods.

**Table S1.** Quantitative information from the EDS/EDX to complement the mapping images of the  $\text{Ni}_{0.2}\text{Mo}_{0.8}\text{N}/\text{MoO}_2$  sample.

| Elements | Atomic % |
|----------|----------|
| N        | 8.76     |
| O        | 35.99    |
| Ni       | 21.02    |
| Mo       | 34.23    |
| Total:   | 100.00   |

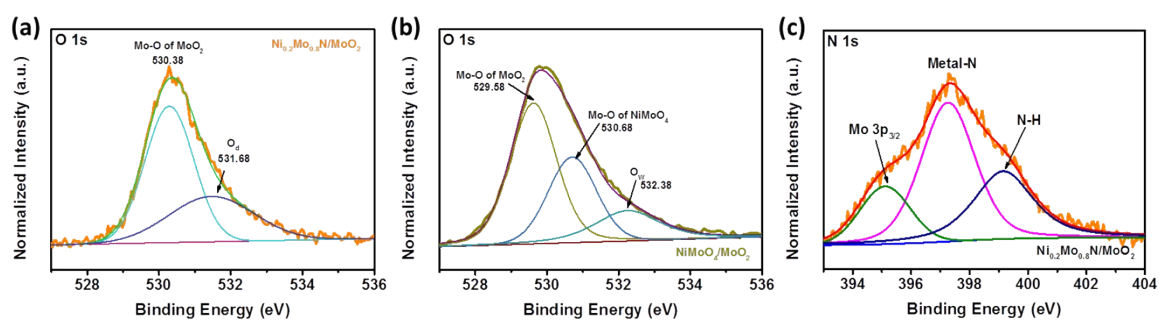

**Figure S5.** O 1s XPS spectra of (a)  $\text{Ni}_{0.2}\text{Mo}_{0.8}\text{N}/\text{MoO}_2$  and (b)  $\text{NiMoO}_4/\text{MoO}_2$ . (c) N 1s XPS spectra of  $\text{Ni}_{0.2}\text{Mo}_{0.8}\text{N}/\text{MoO}_2$ .

**Table S2.** HER properties of recently reported NiMoN-based catalysts.

| Catalyst                                                                       | HER, $\eta$ @<br>10 mA cm <sup>-2</sup> | Tafel slope,<br>mV dec <sup>-1</sup> | Reference |
|--------------------------------------------------------------------------------|-----------------------------------------|--------------------------------------|-----------|
| Ni <sub>0.2</sub> Mo <sub>0.8</sub> N/MoO <sub>2</sub>                         | 13                                      | 264                                  | This work |
| NiMoO <sub>4</sub> /MoO <sub>2</sub>                                           | 194                                     | 323                                  | This work |
| Ni <sub>3</sub> N/Ni <sub>0.2</sub> Mo <sub>0.8</sub> N/NF                     | 55                                      | 246                                  | 2         |
| Ni <sub>0.2</sub> Mo <sub>0.8</sub> N/Fe–Ni <sub>3</sub> N/NF                  | 40@20                                   | 266                                  | 3         |
| hexagonal V–Ni <sub>0.2</sub> Mo <sub>0.8</sub> N                              | 39                                      | 245@25                               | 4         |
| Ni <sub>0.2</sub> Mo <sub>0.8</sub> N/NiMoP <sub>2</sub> /MoO <sub>2</sub> @NC | 48                                      | -                                    | 5         |
| Ni <sub>0.2</sub> Mo <sub>0.8</sub> N/Ni heterostructures                      | 14                                      | -                                    | 6         |
| Ni <sub>0.2</sub> Mo <sub>0.8</sub> N/Ni <sub>3</sub> N                        | 49                                      | -                                    | 7         |
| NiSe <sub>2</sub> –NPs/NiMoN–NRs                                               | 58                                      | 241                                  | 8         |
| Ni <sub>3</sub> N–Mo <sub>2</sub> N/NF                                         | 66                                      | 252                                  | 9         |
| Ni <sub>3</sub> N–NiMoN                                                        | 31                                      | 277                                  | 10        |
| Ni–Fe/NiMoN <sub>x</sub>                                                       | 49@20                                   | 260@20                               | 11        |

**Table S3.** The relevant parameters from the fitted the Nyquist plots of the catalysts in HER.

| Electrodes                                             | $R_s$ ( $\Omega$ ) | $R_{ct}$ ( $\Omega$ ) |
|--------------------------------------------------------|--------------------|-----------------------|
| NiMoO <sub>4</sub> /MoO <sub>2</sub>                   | 1.93               | 3.17                  |
| Ni <sub>0.2</sub> Mo <sub>0.8</sub> N/MoO <sub>2</sub> | 2.33               | 1.58                  |

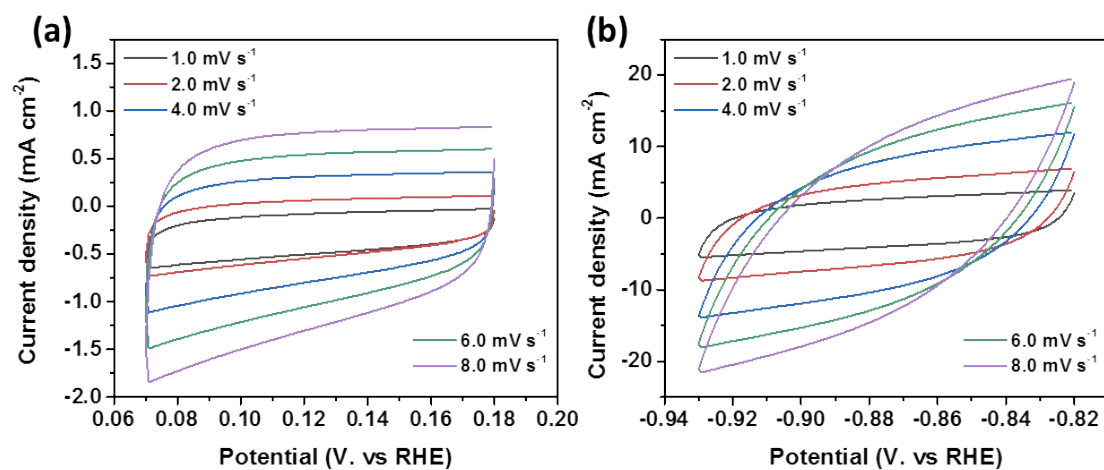

**Figure S6.** CV curves of (a) NiMoO<sub>4</sub>/MoO<sub>2</sub> and (b) Ni<sub>0.2</sub>Mo<sub>0.8</sub>N/MoO<sub>2</sub> for the HER.

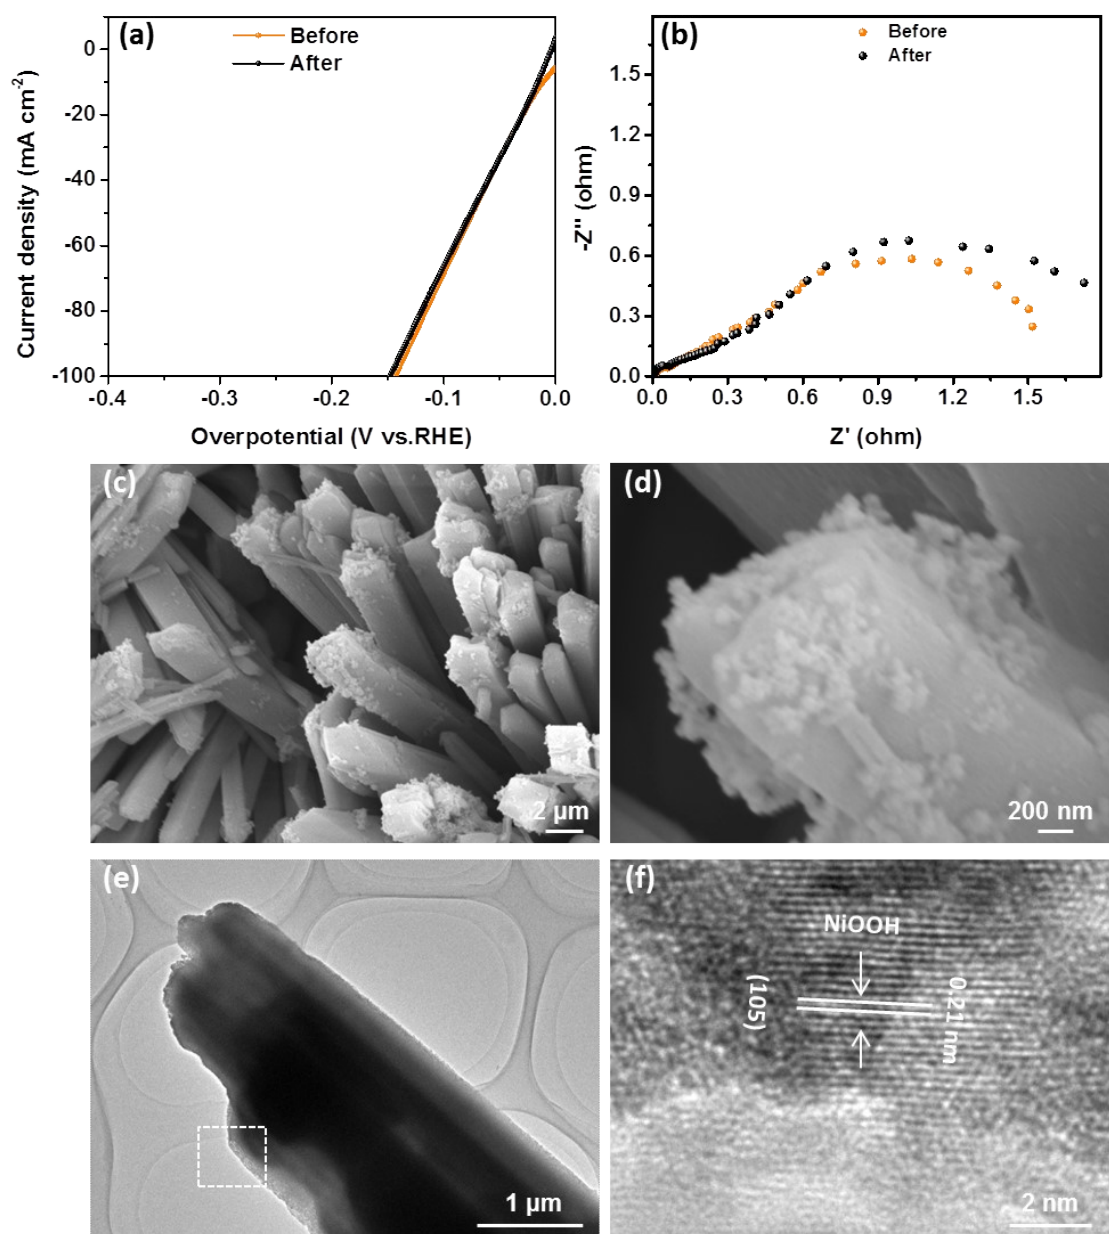

**Figure S7.** (a) HER polarization curves and (b) Nyquist plots of the  $\text{Ni}_{0.2}\text{Mo}_{0.8}\text{N}/\text{MoO}_2$  catalyst after stability test. (c, d) SEM and (e, f) TEM images of  $\text{Ni}_{0.2}\text{Mo}_{0.8}\text{N}/\text{MoO}_2$  after stability test.

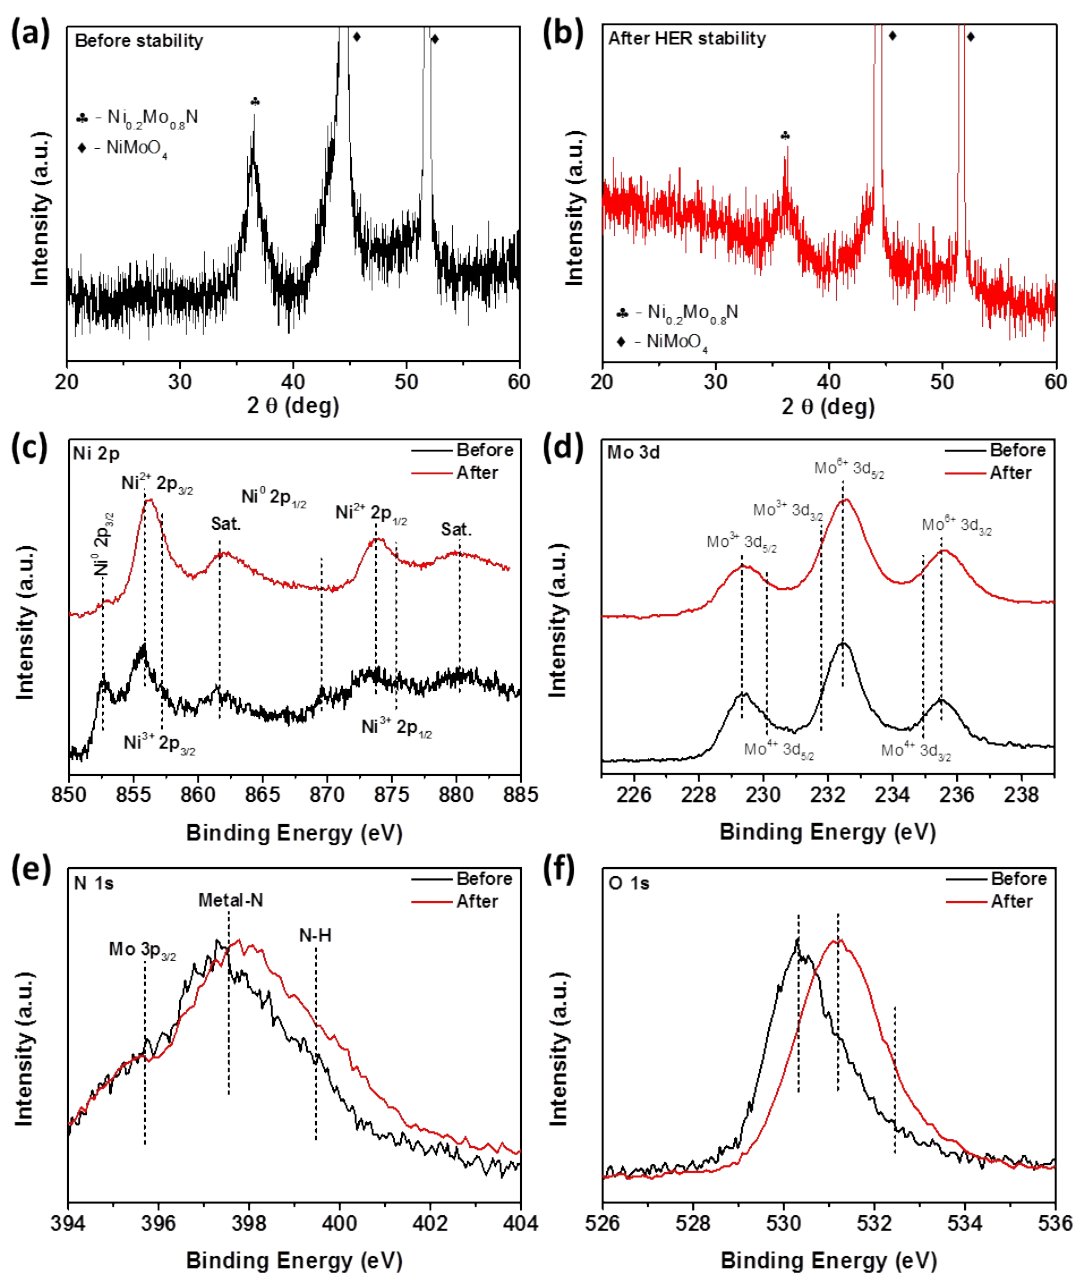

**Figure S8.** XRD spectra of  $\text{Ni}_{0.2}\text{Mo}_{0.8}\text{N}/\text{MoO}_2$  (a) before and (b) after HER stability test. (c) Ni 2p, and (d) Mo 3d, (e) N 1s and (f) O 1s XPS spectra of  $\text{Ni}_{0.2}\text{Mo}_{0.8}\text{N}/\text{MoO}_2$  before and after HER stability test.

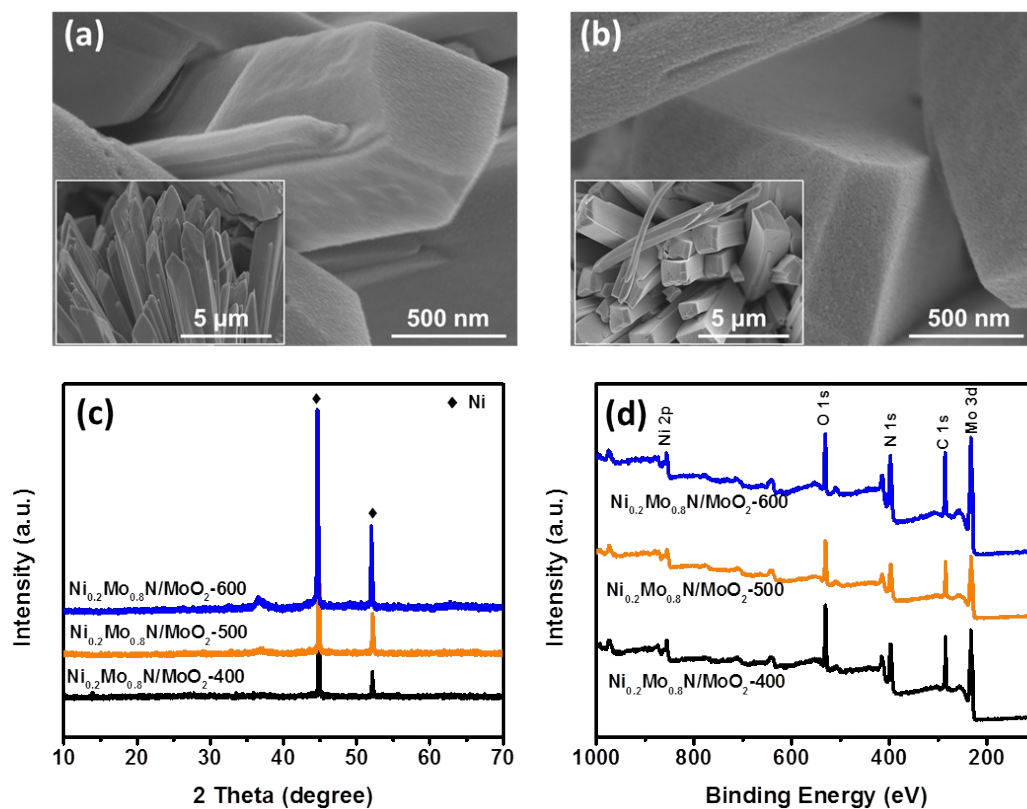

**Figure S9.** SEM images of (a)  $\text{Ni}_{0.2}\text{Mo}_{0.8}\text{N}/\text{MoO}_2$ -400 and (b)  $\text{Ni}_{0.2}\text{Mo}_{0.8}\text{N}/\text{MoO}_2$ -600. (c) XRD pattern and (d) XPS survey spectra of  $\text{Ni}_{0.2}\text{Mo}_{0.8}\text{N}/\text{MoO}_2$ -400,  $\text{Ni}_{0.2}\text{Mo}_{0.8}\text{N}/\text{MoO}_2$ -500 (optimized catalyst) and  $\text{Ni}_{0.2}\text{Mo}_{0.8}\text{N}/\text{MoO}_2$ -600.

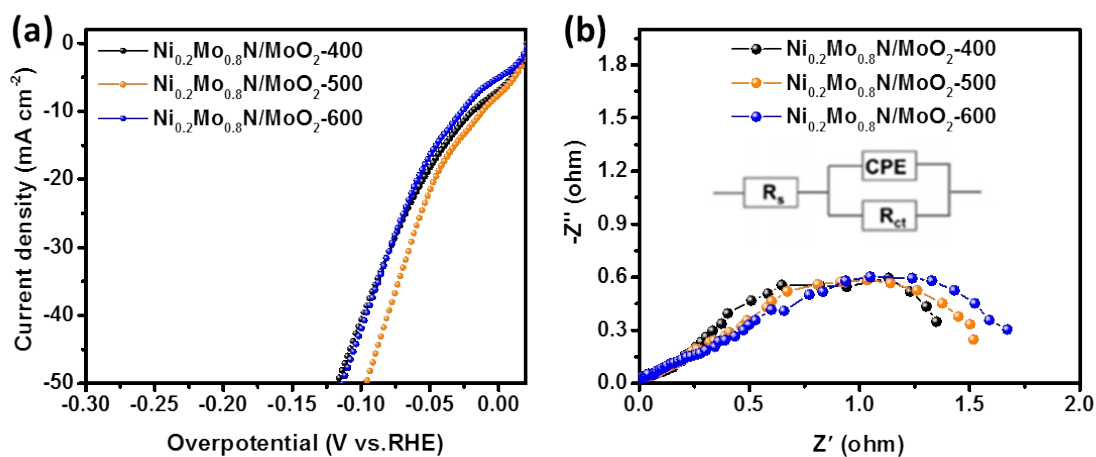

**Figure S10.** (a) HER Polarization curves and (b) Nyquist plots of  $\text{Ni}_{0.2}\text{Mo}_{0.8}\text{N}/\text{MoO}_2$ -400,  $\text{Ni}_{0.2}\text{Mo}_{0.8}\text{N}/\text{MoO}_2$ -500 (optimized catalyst) and  $\text{Ni}_{0.2}\text{Mo}_{0.8}\text{N}/\text{MoO}_2$ -600.

**Table S4.** The relevant parameters from the fitted the Nyquist plots of the catalysts in HER.

| Electrodes                                                 | $R_s$ ( $\Omega$ ) | $R_{ct}$ ( $\Omega$ ) |
|------------------------------------------------------------|--------------------|-----------------------|
| $\text{Ni}_{0.2}\text{Mo}_{0.8}\text{N}/\text{MoO}_2$ -400 | 2.06               | 1.96                  |
| $\text{Ni}_{0.2}\text{Mo}_{0.8}\text{N}/\text{MoO}_2$ -500 | 2.33               | 1.58                  |
| $\text{Ni}_{0.2}\text{Mo}_{0.8}\text{N}/\text{MoO}_2$ -600 | 1.68               | 1.89                  |

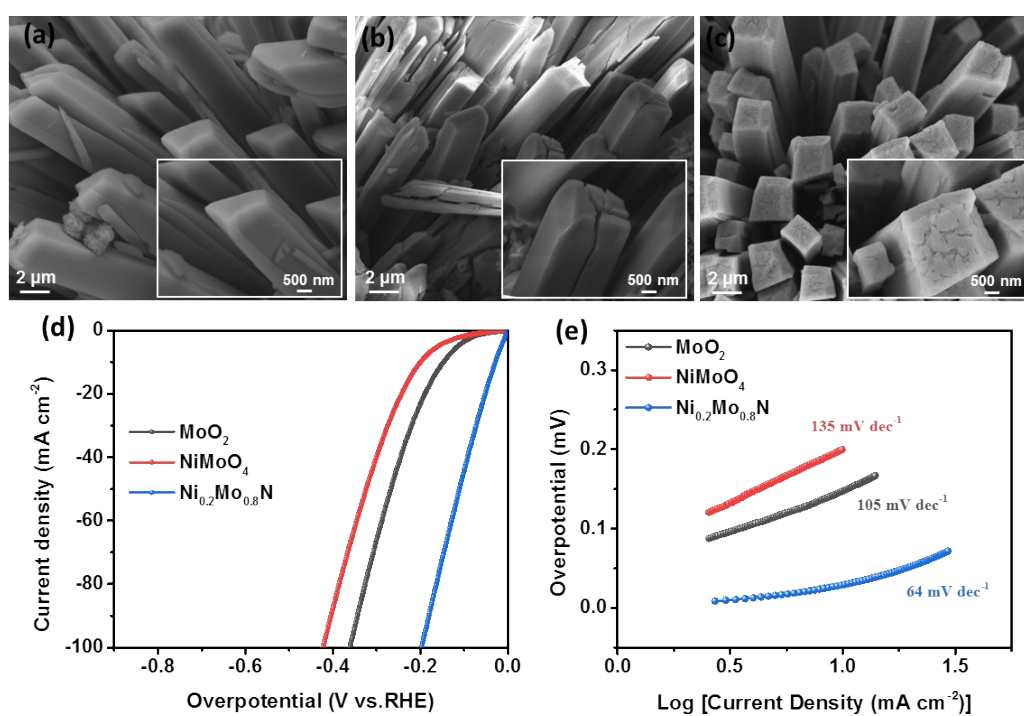

**Figure S11.** SEM images of (a)  $\text{NiMoO}_4$ , (b)  $\text{MoO}_2$  and (c)  $\text{Ni}_{0.2}\text{Mo}_{0.8}\text{N}$ . (d) LSV curves and (e) Tafel plots of  $\text{NiMoO}_4$ ,  $\text{MoO}_2$  and  $\text{Ni}_{0.2}\text{Mo}_{0.8}\text{N}$  for the HER.

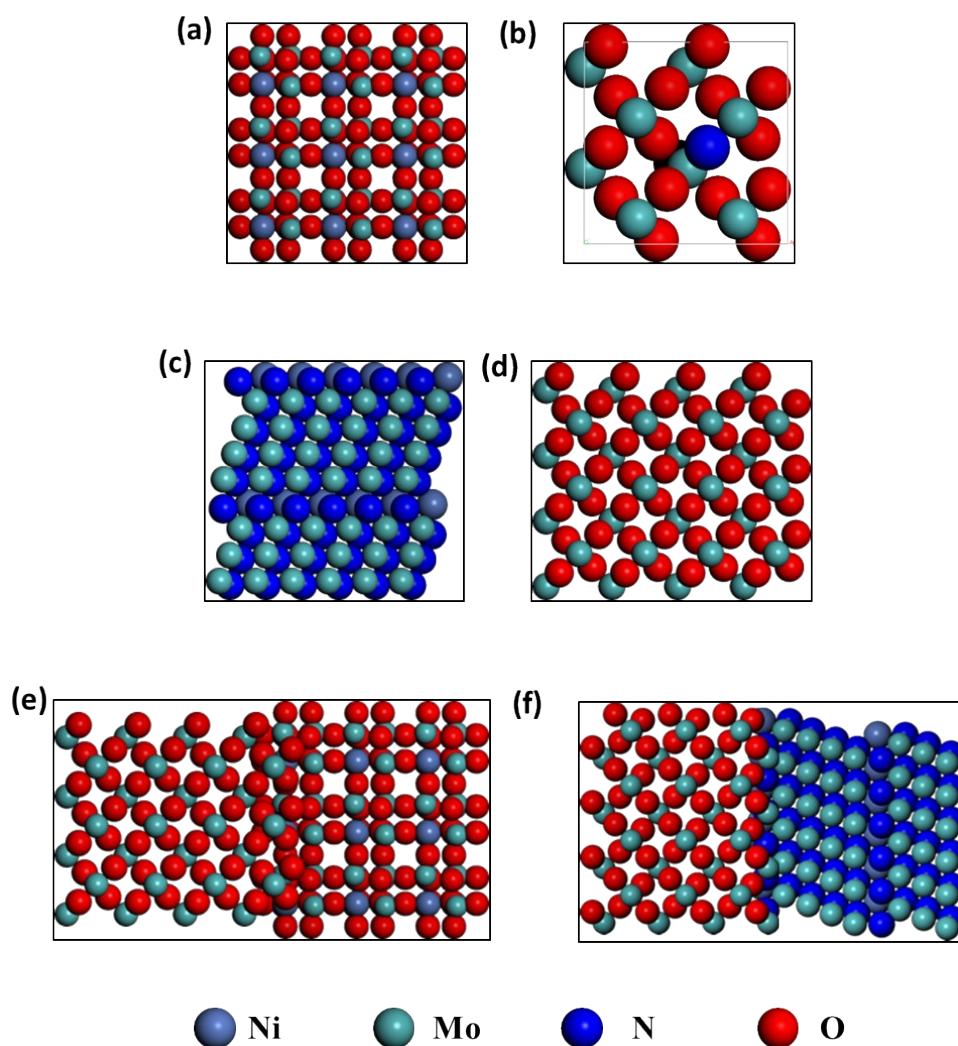

**Figure S12.** The structural models of (a)  $\text{MoO}_2$ , (b)  $\text{N-MoO}_2$ , (c)  $\text{Ni}_{0.2}\text{Mo}_{0.8}\text{N}$ , (d)  $\text{NiMoO}_4$ , (e)  $\text{NiMoO}_4/\text{MoO}_2$  and (f)  $\text{Ni}_{0.2}\text{Mo}_{0.8}\text{N}/\text{MoO}_2$ .

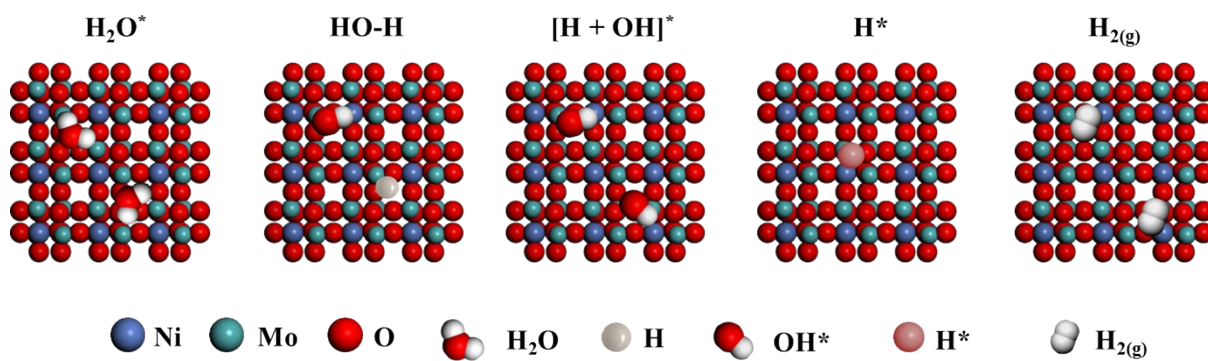

**Figure S13.** The optimized structural models for the water adsorption, water activation, water dissociation, hydrogen adsorption and hydrogen evolution on  $\text{MoO}_2$ .

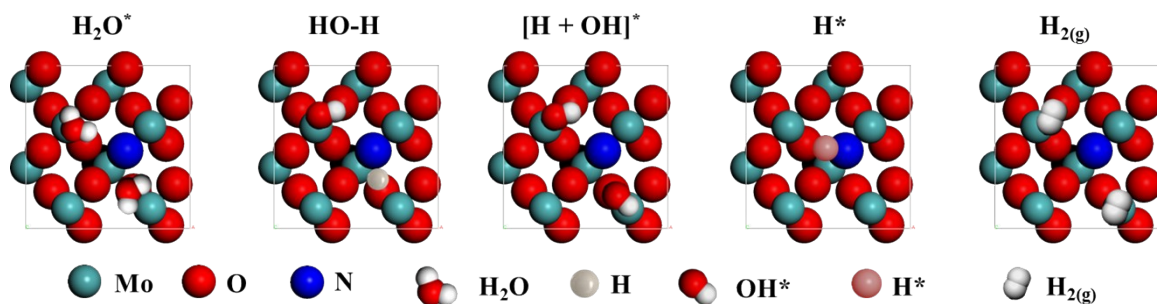

**Figure S14.** The optimized structural models for the water adsorption, water activation, water dissociation, hydrogen adsorption and hydrogen evolution on N-MoO<sub>2</sub>.

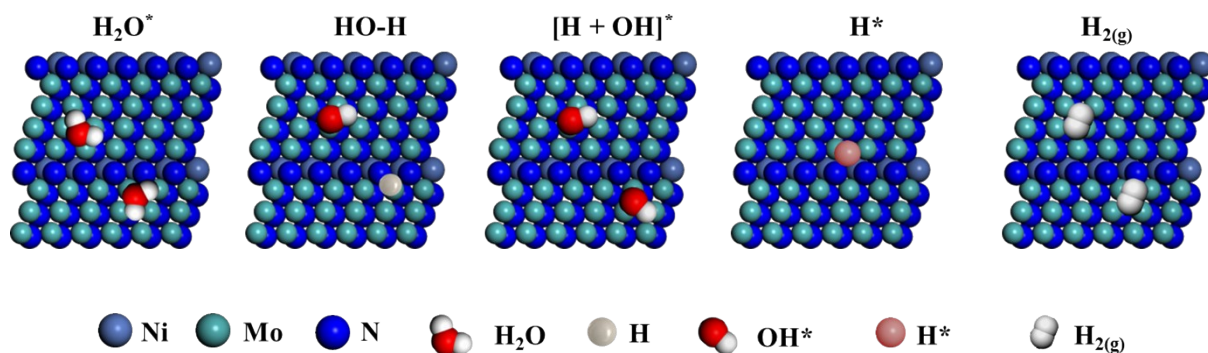

**Figure S15.** The optimized structural models for the water adsorption, water activation, water dissociation, hydrogen adsorption and hydrogen evolution on Ni<sub>0.2</sub>Mo<sub>0.8</sub>N.

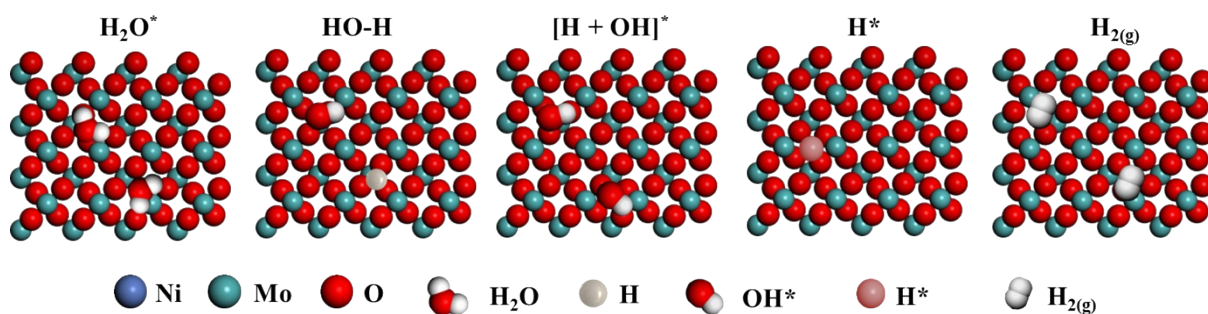

**Figure S16.** The optimized structural models for the water adsorption, water activation, water dissociation, hydrogen adsorption and hydrogen evolution on NiMoO<sub>4</sub>.

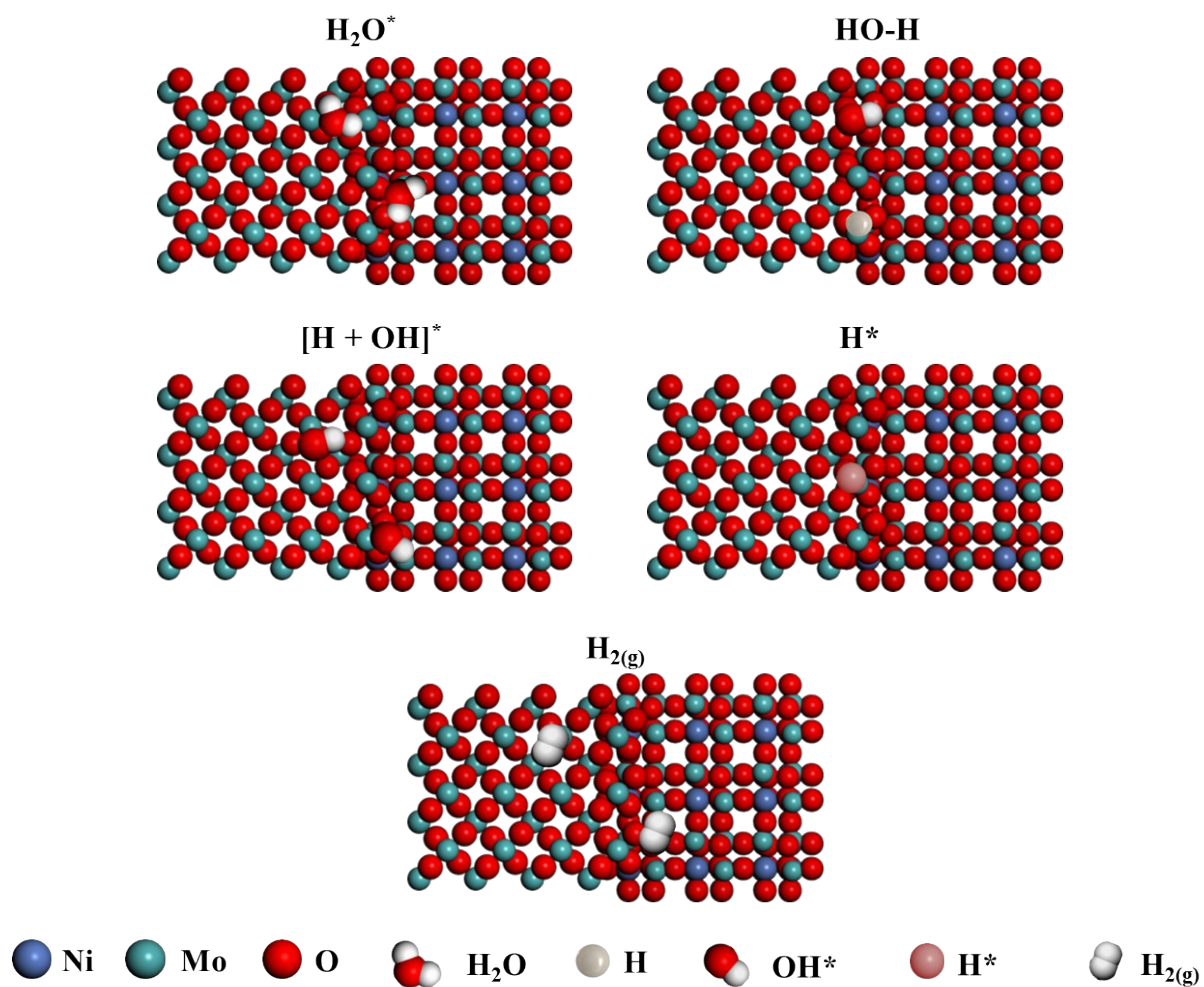

**Figure S17.** The optimized structural models for the water adsorption, water activation, water dissociation, hydrogen adsorption and hydrogen evolution on  $\text{NiMoO}_4/\text{MoO}_2$ .

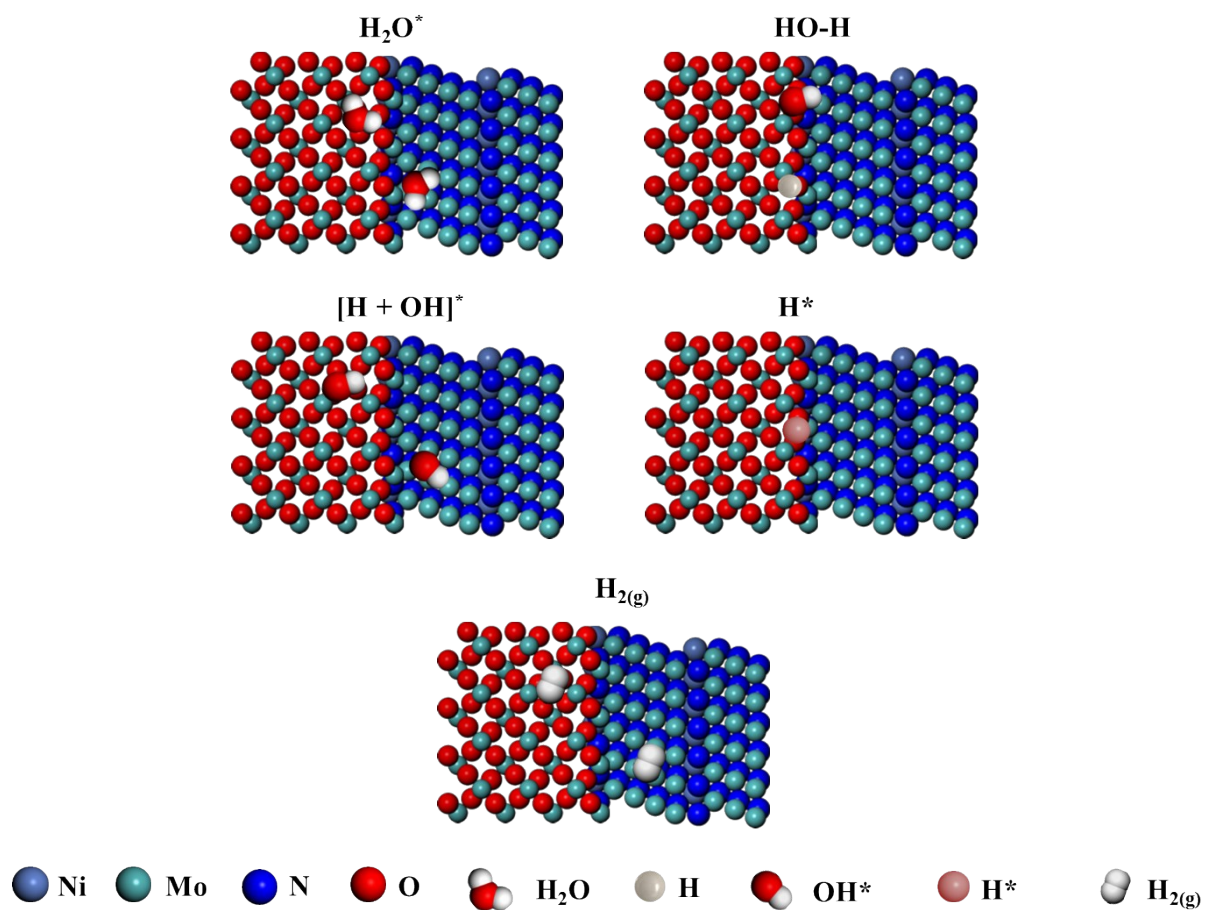

**Figure S18.** The optimized structural models for the water adsorption, water activation, water dissociation, hydrogen adsorption and hydrogen evolution on  $\text{Ni}_{0.2}\text{Mo}_{0.8}\text{N}/\text{MoO}_2$ .

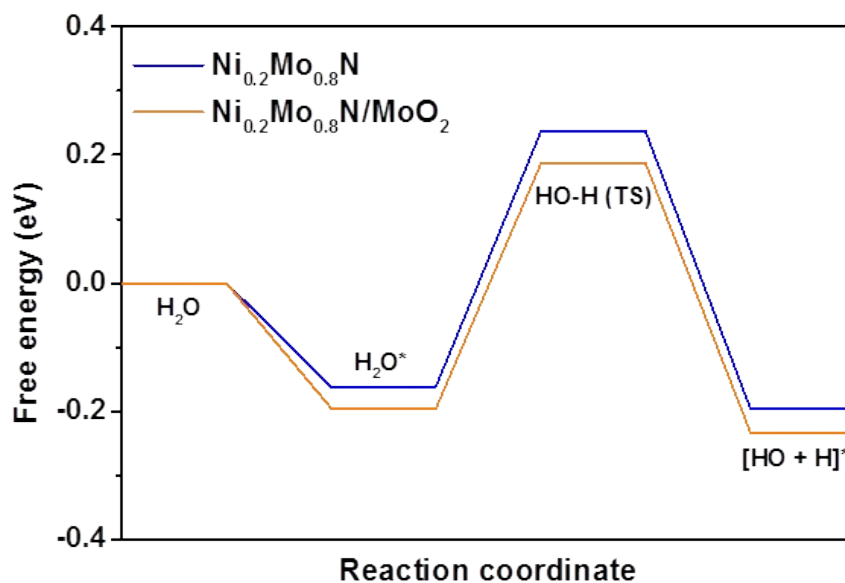

**Figure S19.** The HER free-energy diagram of H<sub>2</sub>O adsorption, activation and dissociation on Ni<sub>0.2</sub>Mo<sub>0.8</sub>N and Ni<sub>0.2</sub>Mo<sub>0.8</sub>N/MoO<sub>2</sub> model catalysts.

## References

1. K. Xu, Y. Sun, X. Li, Z. Zhao, Y. Zhang, C. Li and H. J. Fan, *ACS Mater. Lett.*, 2020, **2**, 736-743.
2. R.-Q. Li, X.-Y. Wan, B.-L. Chen, R.-Y. Cao, Q.-H. Ji, J. Deng, K.-G. Qu, X.-B. Wang and Y.-C. Zhu, *Chem. Eng. J.*, 2021, **409**, 128240.
3. C. Liu, H. Zhu, S. Lu, F. Xu, F. Duan and M. Du, *RSC Adv.*, 2021, **11**, 19797-19804.
4. P. Zhou, X. Lv, D. Xing, F. Ma, Y. Liu, Z. Wang, P. Wang, Z. Zheng, Y. Dai and B. Huang, *Appl. Catal. B-Environ.*, 2020, **263**, 118330.
5. Y. Yan, X. Cao, L. Ning, F. Lin, W. Qin, X. Liu and W. Gu, *ACS Appl. Nano Mater.*, 2022, **5**, 7778-7786.
6. B. Zhang, L. Zhang, Q. Tan, J. Wang, J. Liu, H. Wan, L. Miao and J. Jiang, *Energy Environ. Sci.*, 2020, **13**, 3007-3013.

7. B. Wang, L. Guo, J. Zhang, Y. Qiao, M. He, Q. Jiang, Y. Zhao, X. Shi and F. Zhang, *Small*, 2022, **18**, 2201927.
8. J. Wang, D. T. Tran, K. Chang, S. Prabhakaran, D. H. Kim, N. H. Kim and J. H. Lee, *Energy Environ. Mater.*, 2022, **DOI**: 10.1002/eem2.12526.
9. R. Dai, H. Zhang, W. Zhou, Y. Zhou, Z. Ni, J. Chen, S. Zhao, Y. Zhao, F. Yu, A. Chen, R. Wang and T. Sun, *J. Alloy. Compd.*, 2022, **919**, 165862.
10. A. Wu, Y. Xie, H. Ma, C. Tian, Y. Gu, H. Yan, X. Zhang, G. Yang and H. Fu, *Nano Energy*, 2018, **44**, 353-363.
11. Y. Qiu, M. Sun, J. Cheng, J. Sun, D. Sun and L. Zhang, *Catal. Commun.*, 2022, **164**, 106426.
